# Supplementary material
Source: bioRxiv or medRxiv preprint supplement (https://www.biorxiv.org/highwire/filestream/138261/field_highwire_adjunct_files/1/461335-2.pdf)
Supplement: Supplementary file [file 461335-2.pdf]

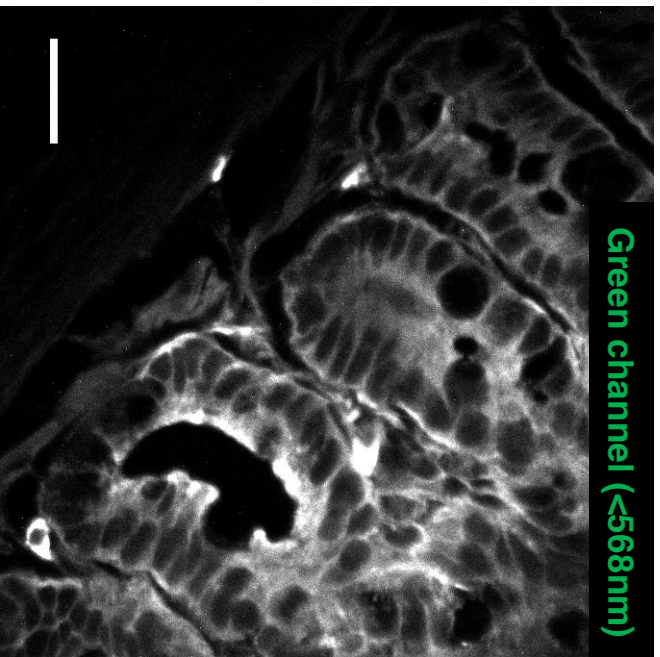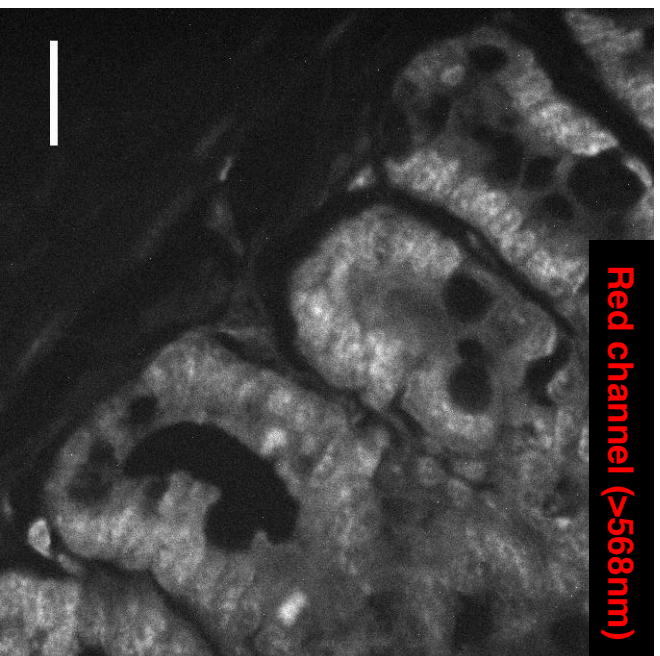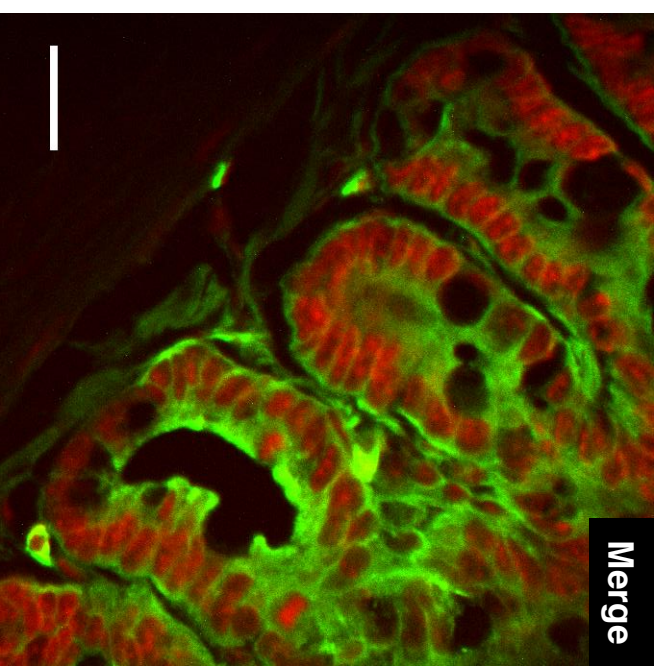

**Control (z)**  
OASIS: 620 mW ; 15,5 mW/spot ; 760nm

**Figure S1**

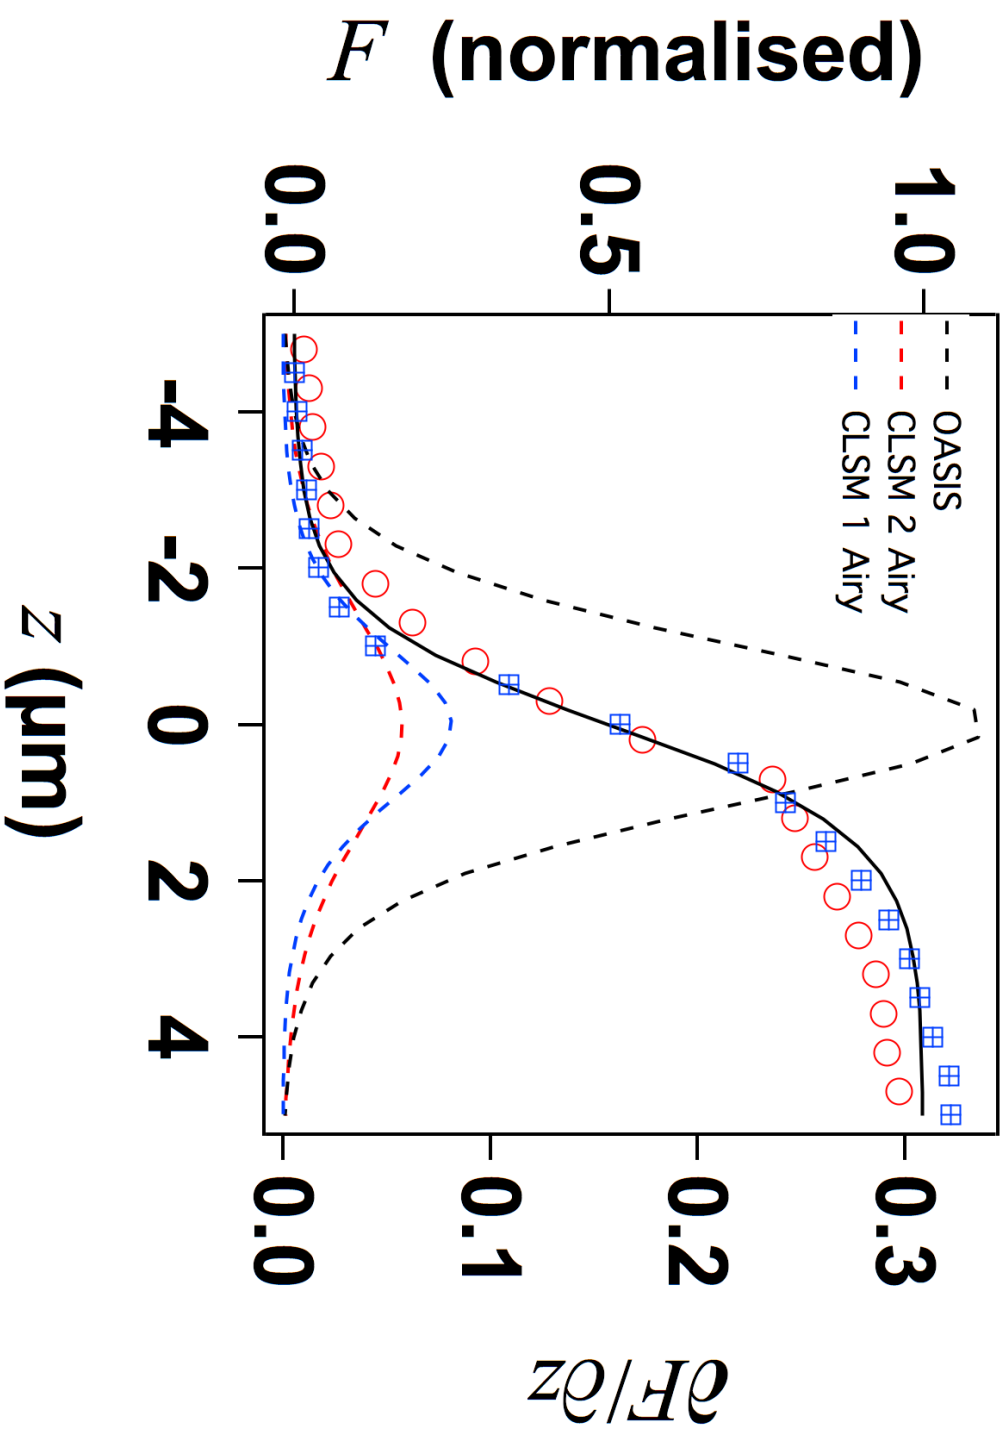

Figure S2

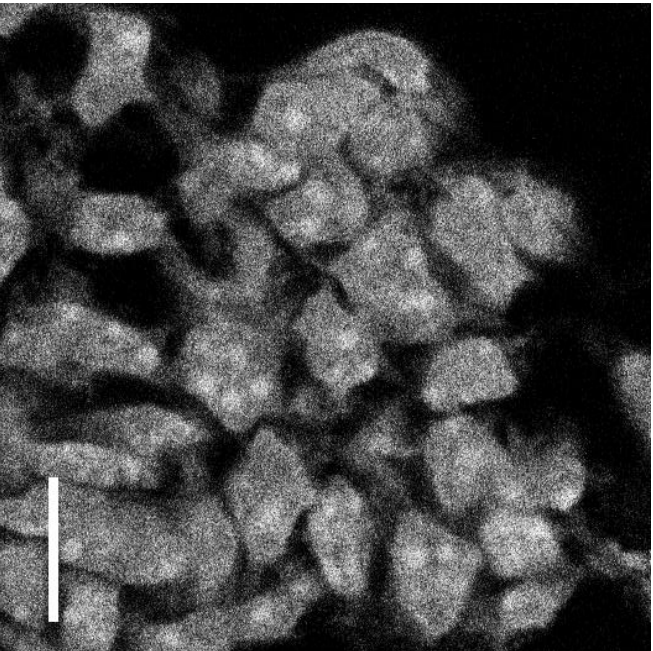

**Control**

Confocal: 0,55  $\mu$ W ; 633nm

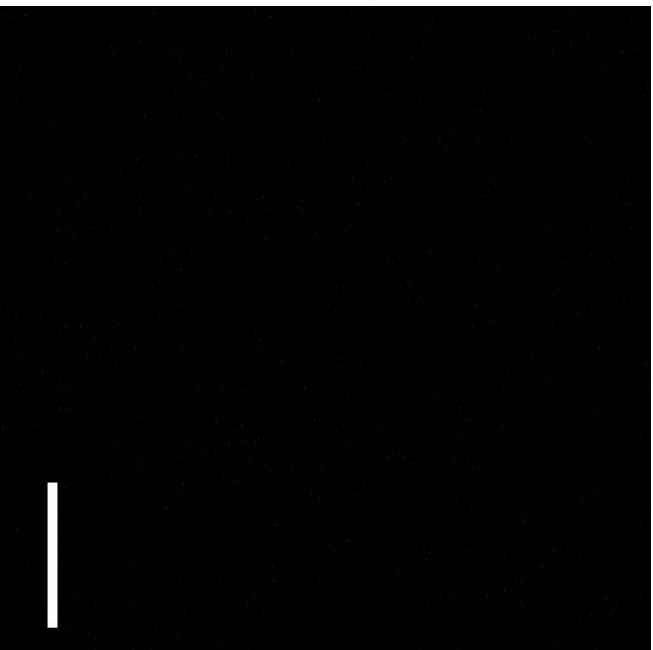

**TDE 60%**

Confocal: 0,55  $\mu$ W ; 633nm

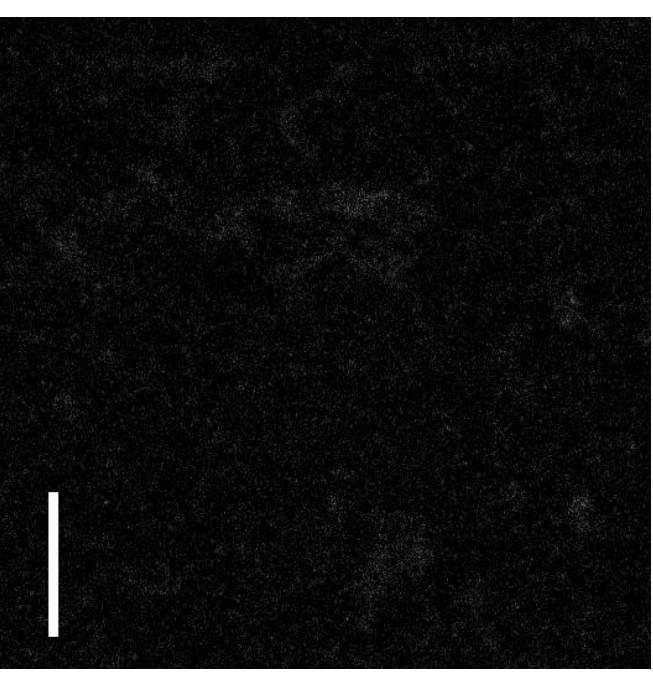

**TDE 60%**

Confocal: 220  $\mu$ W ; 633nm

**Figure S3**

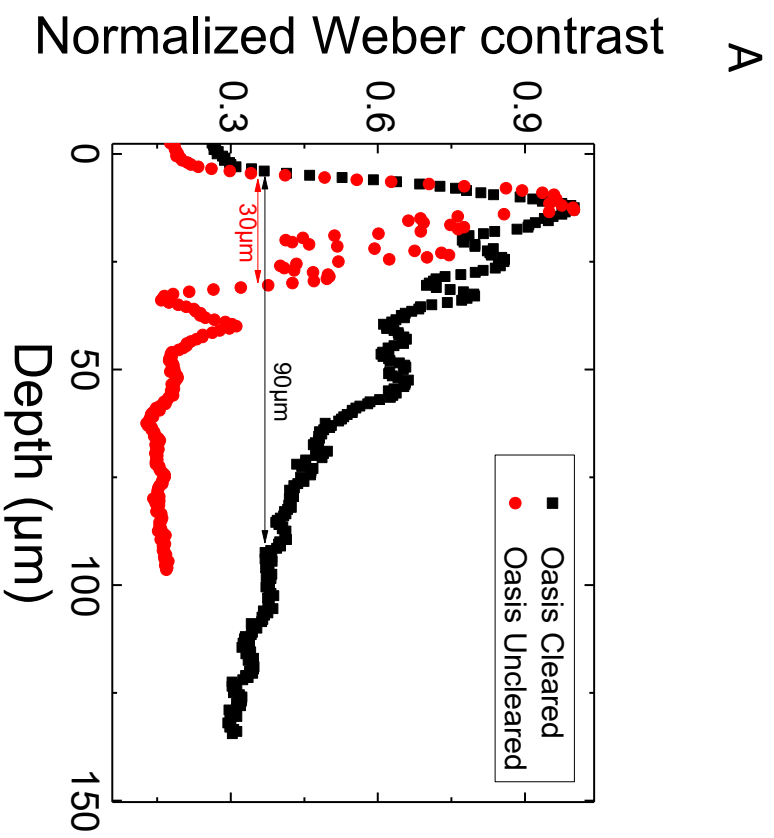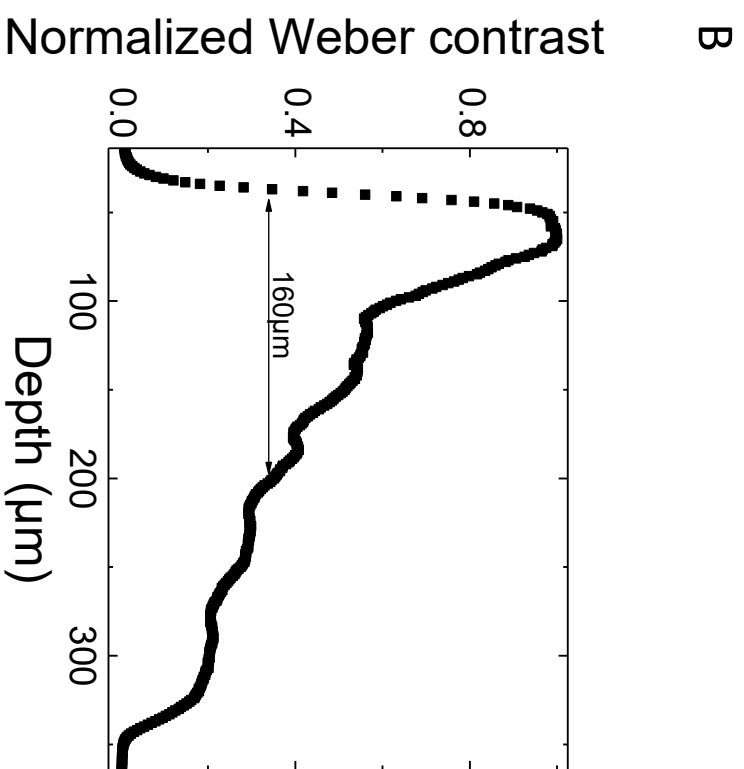

Figure S4
